# Supplementary material for: Concentration, distribution, and fractionation of metals in the filter material of 29 bioretention facilities: a field study
Source: Royal Society of Chemistry journal article supplement (doi:10.1039/d2ew00823h), 2023-01-01
Supplement: d2ew00823h2.xlsx [file d2ew00823h2.xlsx]

## Sheet: All data 1
Sample	Site	Location	Depth	Filter material	Cd	Cr	Cu	Ni	Pb	Zn	DM	pH	Time shake--> pH	LOI	SSA
#	#	#	#	Soil class	mg/kg DM	mg/kg DM	mg/kg DM	mg/kg DM	mg/kg DM	mg/kg DM	%	pH	h	%	SSA
1	1	1	1	sandy loam	0.234	49.5	16.7	15.4	15.7	113	95.4	7.2	2	5.75	1.918
2	1	1	2		0.278	8.57	41.2	20.2	15	140	94.6			4.47	4.002
3	1	1	3	sand	0.414	8.95	26.8	21.5	29.6	380	90.5			6.71
4	1	2	1		0.557	14.7	43	32.2	46.4	380	69.3			16.7
5	1	2	2	sandy loam	0.495	11.5	31.9	28.3	30.5	339	78.1			14.2
6	1	2	3	sand	0.705	15.6	38.8	34	41.6	329	77.4			14
7	1	3	1	loamy sand	0.348	13.3	22.9	20	21.3	191	84.2			10.1
8	1	3	2	loamy sand	0.732	19	52.4	36.1	47	434	61.9			22.1
9	1	3	3	sand	0.631	9.81	26.4	25.1	18.6	131	85.6			6.96
10	2	1	1	sand	0.366	15	28.6	13.9	24.3	248	87.4	7.2	2.2	7
11	2	1	2	sand	0.366	11.8	28.8	14.7	20.6	256	80.5
12	2	1	3	sand	0.7	10.7	26	26.6	20.4	137	82.4
13	2	2	1	sand	0.569	20.1	33.6	14.3	21.4	280	90.2
14	2	2	2	sand	0.398	10.9	93.6	16.1	18.1	272	89.7
15	2	2	3	sand	0.656	9.26	23.8	23.6	15.4	127	84.2
16	2	3	1	sandy loam	0.86	17.1	69.3	25.4	36.7	418	52.2
17	2	3	2	sandy loam	0.859	22	92.5	27.6	43.1	561	53.3
18	2	3	3	sand	0.707	9.47	29.3	23.8	15.8	163	85.1
19	3	1	1	sandy loam	0.522	29.5	55.6	18.3	82	391	62.8	7.1	2.2	18.6
20	3	1	2	sand	0.528	25.2	47.8	18	65.5	488	77.5
21	3	1	3	sand	0.703	10.2	24.6	23.3	17.5	136	86.5
22	3	2	1	sandy loam	0.706	41.8	83	22.8	111	674	59.6
23	3	2	2	loamy sand	0.875	9.91	24.8	22.6	32.7	137	85.4
24	3	2	3	loamy sand	0.648	12.5	29.9	21.7	25.7	181	84.2
25	3	3	1	sand	0.717	11.4	26.2	23	26.3	155	82.1
26	3	3	2	sand	0.653	8.92	19.6	23.2	18.1	76.2	89.4
27	3	3	3	sand	0.638	9.94	22.1	21.9	16.8	91.3	89.4
28	4	1	1	loamy sand	0.38	13.1	33	22	58.3	188	85.3	7.3	2.2	6.6
29	4	1	2	sand	0.374	13.8	30.7	20.3	55.3	193	86.6
30	4	1	3	sand	0.549	8.39	26.4	19.6	26.4	128	87.1
31	4	2	1	sandy loam	0.62	17.3	58	22.6	52	281	65.8
32	4	2	2	sand	0.704	8.93	24.7	20.5	22	100	88
33	4	2	3	sand	0.642	8.16	22.4	21.2	16.2	94.4	88.2
34	4	3	1	loamy sand	0.598	9.09	26.1	21.3	21.2	119	75.9
35	4	3	2	sand	0.533	8.54	21.2	22.7	15	80.5	88.7
36	4	3	3	sand	0.575	7.41	18.1	21.4	13.7	73.5	89.1
37	5	1	1	silt loam	0.747	23.3	73.9	26	30.4	514	54.9	2		22.5	2.409
38	5	1	2	loamy sand	0.657	9.41	30.5	23.6	17.8	141	79.9			7.37	6.473
39	5	1	3	loamy sand	0.557	8.84	22.6	20.2	15.9	130	79.4			8.34
40	5	2	1	silt loam	0.613	25.6	70.2	23.8	32	660	40.6			41.2
41	5	2	2	sandy loam	0.972	17.4	54.8	33.1	27	273	72.9			12.7
42	5	2	3	loamy sand	0.647	8.66	24.8	19.3	16.2	125	79.4			8.23
43	5	3	1	silt loam	0.698	22.3	71.9	23.8	32.6	598	44.6			45.7
44	5	3	2	sandy loam	0.844	13.1	44.5	26.7	19.8	215	76.4			8.59
45	5	3	3	loamy sand	0.568	7.86	19.7	22.3	16.4	80.1	83.5			7.34
46	6	1	1	sand	0.258	5.44	13.2	14.8	7.65	48.8	91.4	2		3.31
47	6	1	2	sand	0.22	4.37	13.7	18.5	7.64	44.8	93.2			3.31	4.16
48	6	1	3	sand	0.219	4.97	14.4	17.5	7.3	41.7	94.6			2.01
49	6	2	1	sand	0.244	6.72	13.8	17.1	9.65	64.8	89.9			4.35
50	6	2	2	sand	0.219	5.53	15.6	17.1	7.35	43.6	93.4			2.04
51	6	2	3	sand	0.305	4.61	15.6	20.1	7.7	65.6	93.9			1.82
52	6	3	1	sand	0.216	5.81	16.7	18.3	8.94	57.9	90.5			3.27
53	6	3	2	sand	0.185	5.59	13.1	17.7	6.97	43	93.1			2.08
54	6	3	3	sand	0.206	4.98	18.3	15.4	9.84	43.1	94.5			2.06
55	7	1	1	sandy loam	0.724	14.7	31.2	18.8	28.6	423	46.5	7.3	2.3	29.7
56	7	1	2	loamy sand	0.656	7.53	21.2	22.6	15.1	101	83.3
57	7	1	3	loamy sand	0.83	6.39	21.4	19.5	15.4	61.5	85.4
58	7	2	1	loamy sand	0.585	6.93	19.8	21	12.8	82.6	79.8
59	7	2	2	loamy sand	0.603	6.87	18.9	19.3	11.1	65.6	81.9
60	7	2	3	sandy loam	0.696	6.37	19.7	19	13.8	67.2	83.7
61	7	3	1	sandy loam	0.94	7.56	18.8	20.5	11.2	86.7	84.1
62	7	3	2	loamy sand	0.478	5.67	18.4	18.2	9.76	55.5	90.3
63	7	3	3	loamy sand	0.664	7.18	21.1	23.3	13.9	73.7	84.4
64	8	1	1	sandy loam	0.541	17.2	45.6	21.6	17.3	232	58.7	7.4	2.3	13.4
65	8	1	2	loamy sand	0.56	8.34	21.9	23.1	12.6	86.2	84.6
66	8	1	3	loamy sand	0.62	7.45	21.8	22.4	12.9	74	77.8
67	8	2	1	sandy loam	0.651	12.5	34.3	24	14.9	174	82.7
68	8	2	2	loamy sand	0.592	8.04	21.7	23.2	11.8	81.6	87.1
69	8	2	3	loamy sand	0.73	8.21	23.9	23.2	13.4	76.9	82.5
70	8	3	1	sandy loam	0.634	10.7	26.9	25.4	15	117	63.2
71	8	3	2	loamy sand	0.639	9.19	22.9	22.8	12.9	105	82.3
72	8	3	3	loamy sand	0.834	8.98	23.4	25.8	15.3	79.4	85.6
73	9	1	1	sandy loam	0.497	25.1	58.5	29.1	23.4	480	56.6	2		7.65	3.2835
74	9	1	2	loamy sand	0.463	8.36	14.8	17.2	15.7	79.5	81.4			21.1	5.3135
75	9	1	3	loamy sand	0.488	7.55	20.6	19.7	19.3	91.6	83			7.66
76	9	2	1	silt loam	0.674	15	61.4	24.3	24.9	389	49.1			34
77	9	2	2	sandy loam	0.447	7.76	14.6	17.7	14	73.6	85.9			6.7
78	9	2	3	loamy sand	0.549	8.58	18.3	21.2	16.4	79.7	82.3			7.78
79	9	3	1	silt loam	0.646	14.8	46.8	20	23.3	272	47			36.8
80	9	3	2	loamy sand	0.5	7.67	17.5	17	17.6	74.1	83.5			10.8
81	9	3	3	loamy sand	0.576	8.25	18.3	18.9	16.3	83.8	82.6			8.57
82	10	1	1	loamy sand	0.582	10.4	26.8	22.4	24.8	129	75.9	6.2	2	11
83	10	1	2	sand	0.636	8.72	21.4	22.6	17.4	86.4	87.2
84	10	1	3	loamy sand	0.487	9.72	19.9	20.1	18.6	74.9	82.7
85	10	2	1	loamy sand	0.515	8.26	22.5	20.1	16.2	95	84.8
86	10	2	2	sand	0.417	6.21	14.7	18.1	12	62.2	90.9
87	10	2	3	sand	0.433	6.03	19.6	16.8	14.9	67.8	88.5
88	10	3	1	loamy sand	0.384	6.34	16.9	13.8	13.1	62.5	83.4
89	10	3	2	sand	0.523	7.27	17	19.1	14.7	69.4	88.8
90	10	3	3	sand	0.456	6.09	16.9	18.2	13	64.2	89.2
91	11	1	1		0.545	29.8	61.8	14.9	73.9	269	70.4	2.1		22.7	1.4335
92	11	1	2		0.494	18.9	57.3	18.6	46.9	226	79.7			17	1.9715
93	11	1	3		0.55	9.67	26.2	20	22.3	124	87			10.7
94	11	2	1		0.546	5.71	25.9	10.5	23.3	84	64.5			32
95	11	2	2		0.728	6.89	25.6	20.1	15.7	109	88.1			8.42
96	11	2	3		0.553	5.65	15	17	13.6	65.8	91.5			4.27
97	11	3	1		0.522	13	24.2	11.5	24.2	95	55.8			34.4
98	11	3	2		0.928	5.48	28	15.8	20.2	110	85			28.9
99	11	3	3		0.531	4.4	16.5	17.8	21.5	62.4	94.9			3.58
100	12	1	1	sandy loam	0.693	13.1	51.1	21.2	71	184	70.7	2.1		15	3.9815
101	12	1	2	sand	0.414	13.7	42.6	13.3	26.7	301	49.6			29.7	1.616
102	12	1	3	sand	0.595	9.7	40	16.8	34.3	137	64			12.8
103	12	2	1	loamy sand	0.432	7.06	27.9	8.77	18.4	182	39.4			39.9
104	12	2	2	sand	0.494	5.33	16.7	12.6	15.3	82	77.3			11.4
105	12	2	3	sand	0.552	8.77	37.5	13.8	29.5	123	69.6			16.9
106	12	3	1		0.42	7.4	30.7	9.83	22.1	157	40.6			43.2
107	12	3	2		0.625	5.81	16.5	64	13	71.7	85.2			8.84
108	12	3	3		0.639	6.2	18.2	14.8	14	73.5	83.1			8.8
109	13	1	1	sand	0.102	7.42	14.1	10.1	9.97	49.5	77.2	6.4	2.1	7.4
110	13	1	2	sand	<0.1	3.65	5.87	6.59	3.28	17.8	97.4
111	13	1	3	sand	<0.1	3.47	8	6.55	2.89	17.6	96.4
112	13	2	1	sand	<0.1	6.24	11	8.34	5.67	44.6	84.5
113	13	2	2	sand	<0.1	3.95	7.79	6.68	3.11	16.9	96.4
114	13	2	3	sand	<0.1	3.44	8.19	8	3.73	21.8	96.3
115	13	3	1	loamy sand	<0.1	5.2	11.8	7.78	6.16	37	83.7
116	13	3	2	sand	<0.1	5.03	8.01	8.35	4	21.8	95.8
117	13	3	3	sand	<0.1	4.77	6.42	6.57	2.94	17.1	94.7
118	14	1	1	sand	0.197	5.77	13.1	8.53	7.2	58.3	65	2.2		31.8	1.884
119	14	1	2	sand	0.106	5.83	9.04	8.67	6.25	24.3	90.8			10.4	2.758
120	14	1	3	sand	<0.1	5.25	8.77	8.46	4.79	20.1	95.1			6.07
121	14	2	1	sand	0.104	4.43	8.97	7.37	5.58	24.7	88.8			10.9
122	14	2	2	sand	0.0981	4.37	8.27	8.77	5.47	30.1	93.7			4.92
123	14	2	3	sand	0.105	5.05	8.39	8.5	4.84	27.5	91.5			4.51
124	14	3	1	sand	0.12	5.11	11.3	8.16	6.48	30.8	83.5			15.8
125	14	3	2	sand	<0.1	9.06	7.22	8.81	5.05	36.9	94.5			4.47
126	14	3	3	sand	0.11	6.67	8.16	10.2	5.62	25.4	92.7			5.04
127	15	1	1	sand	0.169	11.8	15.4	10.5	12.3	163	72.9	6.8	2.2	9.3
128	15	1	2	sand	<0.1	5.02	13.1	8.06	3.66	24.7	96.5
129	15	1	3	sand	<0.1	5.41	7.85	8.69	3.97	22.9	90.9
130	15	2	1	sand	<0.1	4.97	9.38	7.73	5.19	31.2	84.7
131	15	2	2	sand	<0.1	4.97	6.82	7.87	4.89	21.2	96.5
132	15	2	3	sand	<0.1	5.32	5.81	7.62	3.18	18.2	96.4
133	15	3	1	sand	0.105	6.27	10.1	9.33	5.65	34.8	83.9
134	15	3	2	sand	<0.1	5.32	7.81	7.95	3.66	21.5	95.5
135	15	3	3	sand	<0.1	4.88	7.01	9.85	3.07	18.1	95.5
136	16	1	1	sandy loam	0.427	22.4	59.2	14.2	26	458	59.6	7.4	2.4	28.2
137	16	1	2	sandy loam	0.352	25.4	30.8	16.9	25.8	197	76.7
138	16	1	3	sandy loam	0.256	14.7	19.1	17.4	24.3	81.9	78.5
139	16	2	1	sandy loam	0.217	20.2	21.1	14.9	26.8	95.8	74
140	16	2	2	sandy loam	0.298	13.7	15	18.4	23.2	73.7	75.3
141	16	2	3	sandy loam	0.252	16.5	18	19.5	28.9	92.5	78.6
142	16	3	1	sandy loam	0.286	16.7	25.6	15.8	23.8	148	68.5
143	16	3	2	sandy loam	0.25	15.4	18.3	19.2	23.7	84.4	81.6
144	16	3	3	sandy loam	0.268	21.9	15.7	18	22	71.9	80.8
145	17	1	1	loamy sand	0.226	8.75	13.6	7.69	27	67.2	70	7	2.2	15.4
146	17	1	2	loamy sand	0.177	7.47	10.6	6.21	17.4	49.3	78.7
147	17	1	3	sand	0.139	4.97	6.12	4.48	11.5	37.8	78.5
148	17	2	1	loamy sand	0.217	11	12.5	6.96	19.1	61.4	74
149	17	2	2	loamy sand	0.19	7.45	10.6	7.09	14.6	43.6	78.6
150	17	2	3	sand	<0.1	4.59	6.15	3.67	8.23	22.9	85.4
151	17	3	1	loamy sand	0.18	6.53	9.92	5.51	14.8	48.2	72
152	17	3	2	loamy sand	0.202	7.77	11.4	6.51	14.3	47.3	76.7
153	17	3	3	sand	0.105	4.87	5.87	4.32	8.52	22.6	83.5
154	18	1	1	sandy loam	0.246	37.9	60.7	22.3	39.9	520	61.7	2.3		19.1
155	18	1	2	loamy sand	0.304	9.52	11.2	9.06	16.1	58.4	77.3			8.56	1.8675
156	18	1	3	loamy sand	0.273	7.48	9.83	7.76	15.4	34.2	70.6			9.2
157	18	2	1	sandy loam	0.393	19.2	30.8	12.6	29.5	203	58.3			19.4
158	18	2	2	loamy sand	0.287	8.87	11.8	10.6	14.5	47.7	78.5			9.41
159	18	2	3	loamy sand	0.311	9.07	8.85	8.87	16.6	36.8	79.7			3.87
160	18	3	1	sandy loam	0.55	36.2	81.7	21.7	85.5	639	63.8			19.3
161	18	3	2	loamy sand	0.281	8.32	23.3	9.27	14.6	38.2	79			8.31
162	18	3	3	loamy sand	0.257	8.09	12.6	10.3	13.4	44.7	80.2			8.58
163	19	1	1	loamy sand	0.22	11.6	19.4	8.72	15.5	110	61.8	2.3		16.9	1.8465
164	19	1	2	loamy sand	0.196	15	19.2	9.25	13.1	65.7	79.8			11.8
165	19	1	3	sand	<0.1	4.37	4.89	4.73	4.55	21.1	89.3			3.68
166	19	2	1	loamy sand	0.315	13	26.7	9.21	19.6	105	61.4			21.4
167	19	2	2	loamy sand	0.185	8.24	13	6.26	10.1	47.9	68.7			15.7
168	19	2	3	loamy sand	0.181	6.51	11	6.87	10	34	76.6			13.9
169	19	3	1	loamy sand	0.229	7.01	13.5	7.03	10.7	43.9	50.2			18
170	19	3	2	loamy sand	0.295	10	14.8	8.2	12.2	49.4	65.6			19.2
171	19	3	3	sand	<0.1	5.7	8.18	8.7	6.28	30	61.5			3.3
172	20	1	1	sand	0.189	10.1	23.7	7.98	12.9	78.3	64.3	7	2.3	14.2
173	20	1	2	sand	0.159	8.61	18.3	8.86	15.2	61.2	82.5
174	20	1	3	sand	0.19	10.3	16.3	11.7	16	54.3	85.6
175	20	2	1	sand	0.147	9.9	23.1	8.76	12.5	58	72.4
176	20	2	2	sand	0.155	9.71	20.7	8.65	13.7	53.9	81.3
177	20	2	3	sand	0.145	7.55	12.9	9.91	12.7	42.1	88.4
178	20	3	1	loamy sand	0.352	21.6	88.5	15.1	27.8	324	65.5
179	20	3	2	sand	0.268	17.3	43	13.4	28.7	174	80.6
180	20	3	3	sand	0.135	5.79	10.5	8.43	11.9	36.4	89.4
181	21	1	1	sandy loam	0.435	31.9	74.8	14	122	376	61.5	6.5	2.1	24.8
182	21	1	2	sand	0.314	10.4	35.2	7.03	22.5	135	84.9
183	21	1	3	sand	0.246	6.11	24.9	5.29	10.6	84.6	83.4
184	21	2	1	loamy sand	0.382	16.2	33	13.9	70.7	131	66.8
185	21	2	2	sand	0.322	10.6	30.6	7.15	28.7	121	79.5
186	21	2	3	sand	0.282	10	31.2	7.22	16.3	138	84.8
187	21	3	1	sand	0.326	15.4	32.6	9.06	99.2	138	67.5
188	21	3	2	sand	0.345	12.2	31.6	8.18	33.9	113	71.1
189	21	3	3	sand	0.334	8.12	29.8	7.45	17.4	112	73.9
190	22	1	1	sandy loam	0.441	15.9	29.4	9.57	25.8	145	50	2.4		14.8	1.6335
191	22	1	2	sandy loam	0.485	15.3	37.8	13.5	33.7	185	53.1			14.4	3.688
192	22	1	3	sandy loam	0.499	14.5	28.6	13.6	68.4	174	67.9			10.1
193	22	2	1	sandy loam	0.47	22.2	35.7	13.8	31	184	55			18
194	22	2	2	sand	0.172	9.87	15.3	8.17	12.9	80.4	75.6			9.8
195	22	2	3	sand	<0.1	4.04	11.5	8.71	8.65	39.8	91.2			1.87
196	22	3	1	sandy loam	0.429	10.8	22.6	9.95	27.3	89.1	65.9			20.7
197	22	3	2	sand	0.237	6.93	14.4	10.7	16	58.4	82.8			8.34
198	22	3	3	sand	0.121	2.89	11.9	9.82	6.89	48.3	92.8			1.21
199	23	1	1	sandy loam	0.54	20.8	32.2	17.8	21.3	232	59.1	2.5		12.4
200	23	1	2	sand	0.34	15.1	26.1	35.4	13	85.4	84			3
201	23	1	3	loamy sand	0.387	40.7	26.5	23.5	18.5	105	86.4			3.28
202	23	2	1	sandy loam	0.74	22.1	33.1	13.7	25.2	163	50.2			28.2
203	23	2	2	loamy sand	0.519	25.5	49.3	16.7	23.7	105	51.5			18.6
204	23	2	3	loamy sand	0.461	26	24	22.2	28.9	139	81.7			4.52
205	23	3	1	sandy loam	0.684	23.8	30.9	16.1	33.8	122	60.9			21.3
206	23	3	2	loamy sand	0.499	14.6	30.7	18.2	37.9	98.7	80.6			7.44
207	23	3	3	sand	0.3	21.3	23.3	18.7	16.9	78.4	88			3.94
208	24	1	1	loamy sand	0.645	18.4	30.4	19.7	63	117	64.9	2.1	18.1	18.1
209	24	1	2	sand	0.334	8.04	18.7	11.6	32	69	84.6
210	24	1	3	sand	0.256	5.02	30.4	8.97	11.9	51.4	86.2
211	25	1	1	sand	0.427	12	24.4	14.7	72.8	127	71.7	2.2	11.8	11.8
212	25	1	2	sand	0.555	5.6	26.3	12	12.5	91.3	88
213	25	1	3	sand	0.243	6.06	17.9	11.6	13	51.6	89.5
214	26	1	1	silt loam	0.541	24.7	52.3	14.6	53.2	471	58.3	7.2	2.3	20.6
215	26	1	2	loamy sand	0.635	29.7	42.3	15.6	50.2	323	66.1
216	26	1	3	loamy sand	0.348	12.1	19.1	12.2	21.2	87.7	77.5
217	26	2	1	silt loam	0.717	15.8	37	11.8	45.1	196	35.2
218	26	2	2	sandy loam	1.58	29.5	43.7	18.5	91.5	594	51.5
219	26	2	3	loamy sand	0.35	11.2	20.9	11.3	20.6	88.5	78.8
220	26	3	1	silt loam	0.716	20	47.9	14.6	74.9	269	38.3
221	26	3	2	sandy loam	0.628	18.1	30	13.2	57.1	199	67.3
222	26	3	3	sandy loam	1.06	14	46.6	10.2	36.4	259	77.9
223	27	1	1	loamy sand	0.122	7.53	17	12.8	30.6	146	74.9	6.9	2.3	12.1
224	27	1	2	sand	0.101	4.46	10.4	8.02	7.51	45.8	88
225	27	1	3	sand	<0.1	3.34	10.2	7.91	9.98	36.2	86.3
226	27	2	1	sand	0.12	4.85	14.2	9.51	9.7	61	90
227	27	2	2	sand	0.112	3.64	17.7	6.9	7.2	36	88.8
228	27	2	3	sand	<0.1	2.8	8.35	5.28	6.08	36.5	87.5
229	27	3	1	loamy sand	0.182	5.58	12.1	8.46	19.1	58.6	83.5
230	27	3	2	sand	0.158	5.07	12.7	8.87	14	49.4	88.2
231	27	3	3	sand	<0.1	2.66	9.61	7	9.98	43.4	90.3
232	28	1	1	loamy sand	0.265	24.2	42.1	19.6	16.9	454	66.9	2.5		11.3	1.9355
233	28	1	2	sand	0.22	7.76	17.4	13.4	11.5	106	89			3.53	4.901
234	28	1	3	sand	0.234	5.58	15.1	12.1	16	53.9	87.2			3.06
235	28	2	1	loamy sand	0.302	16	23.1	15	16	185	77.9			14.7
236	28	2	2	sand	0.235	6.4	16.4	13.6	13.3	86.3	88.8			5.3
237	28	2	3	sand	0.189	6.22	13	12.3	11.7	61.5	88.8			3.22
238	28	3	1	sand	0.228	9.4	19.9	17.9	19.7	132	77.5			12.6
239	28	3	2	sand	0.216	6.36	14.5	13.5	14.2	61.1	90.3			5.25
240	28	3	3	sand	0.254	7.73	15.2	14	12.2	77.9	91.2			2.89
241	29	1	1	loamy sand	0.47	60.9	51.7	33	31.5	813	67.5	7.1	2.4	13.9
242	29	1	2	sand	0.155	8.01	14.9	11.2	14.4	83.6	88
243	29	1	3	sand	0.154	5.59	12.9	10.7	15.8	51.7	89.9
244	29	2	1	sand	0.182	11.3	19.6	13.8	16.5	133	85.6
245	29	2	2	sand	0.183	7.46	14.7	15.1	14.4	60.1	93
246	29	2	3	sand	0.177	6.15	16.8	11.8	15.8	62.4	90.5
247	29	3	1	sand	0.235	9.44	15.2	14.8	17.2	571	83.5
248	29	3	2	sand	0.171	5.9	15	15.9	14.7	125	90.4
249	29	3	3	sand	0.135	5.44	14.7	10.8	12.2	64.4	89.7
